# Supplementary material for: The FUSED LEAVES1‐ADHERENT1 regulatory module is required for maize cuticle development and organ separation
Source: PubMed Central journal article supplement (PMC7754373; doi:10.1111/nph.16837), 2020-08-27
Supplement: NPH-229-388-s001.pdf [file NPH-229-388-s001.pdf]

## SUPPORTING INFORMATION

### **THE FUSED LEAVES1-*ADHERENT1* REGULATORY MODULE IS REQUIRED FOR MAIZE CUTICLE DEVELOPMENT AND ORGAN SEPARATION**

Xue Liu, Richard Bourgault, Mary Galli, Josh Strable, Zongliang Chen, Fan Feng, Jiaqiang Dong, Isabel Molina, Andrea Gallavotti

Article acceptance date: 22 July, 2020.

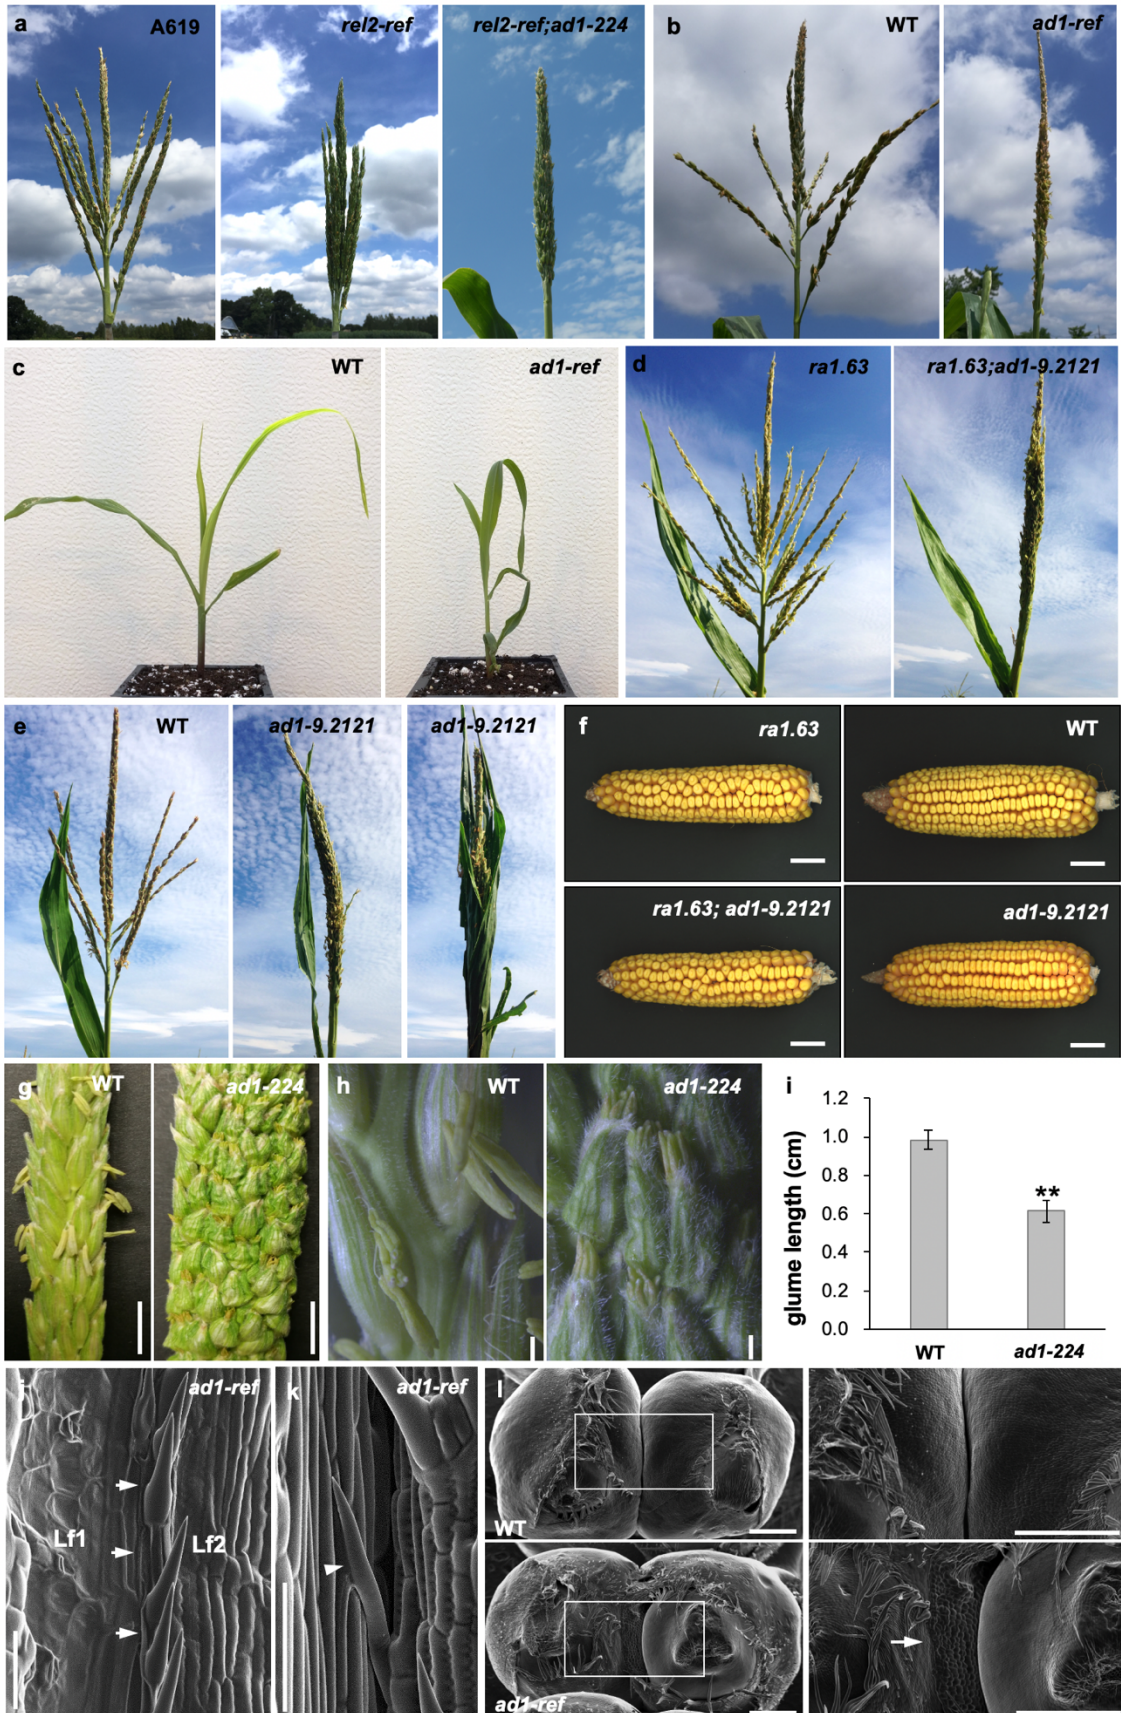

**Figure S1.** Phenotypic characterization of *ad1* alleles.

(a) The tassel phenotype of A619, *rel2-ref* and *rel2-ref;ad1-224* original M2 family. (b) The tassel phenotype of wild type sibling and *ad1-ref* mutants. (c) The seedling phenotype of wild type sibling and *ad1-ref* mutants. (d) The original *ad1-9.2121* allele in *ra1-63.3359* Mo17 background. (e) The *ad1-9.2121* allele in BC3(B73). (f) Mature ear phenotype of *ad1-9.2121* mutants. No visible defects is observed. (g) Tassel spikelets of wild type and *ad1-224* mutants. Scale bars, 1 cm. (h) Images of glumes in wild type and *ad1-224* mutant tassels. Scale bars, 0.1 cm. (i) Quantification of the glume length of wild type and *ad1-224* mutants ( $n \geq 20$ ). Error bars show SD;  $**p < 0.001$ . (j) SEM image showing the second leaf (Lf2) fused to the surface of first leaf (Lf1) along the edge in *ad1-224* mutants. (k) SEM showing a macrohair fused to epidermal cells in *ad1-224* mutants. Scale bars in J and K, 100 $\mu$ m. (l) SEM images of immature ears in wild type and *ad1-ref*. The glume of adjacent spikelets are fused in *ad1-ref* mutants. Right image is higher magnification of the area framed in left panel. Scale bars, 500 $\mu$ m. Arrows point to regions of fusion events.



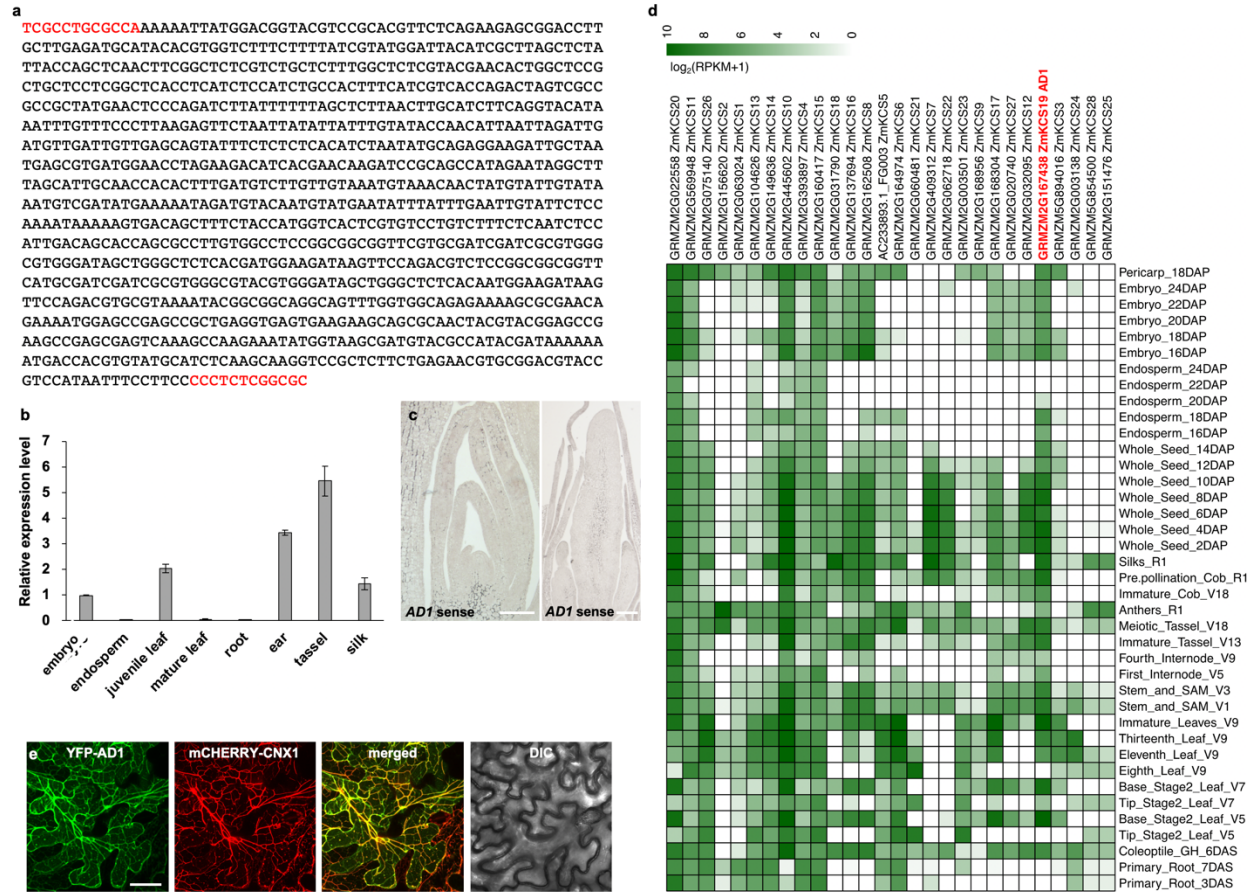

**Figure S2.** Expression analysis of the *KCS* gene family in maize.

(a) Sequence of the insertion in the *ad1-ref* allele at position +947. In red, partial coding sequence. (b) Quantitative RT-PCR of *AD1* in different maize tissues. The y axis shows the fold change relative to embryo expression levels. Error bars show SD, n=3. (c) *In situ* hybridizations of *AD1* sense control probe in embryo (left panel) and tassel (right panel). Scale bar, 200  $\mu$ m. (d) RNA-seq expression levels of *KCS* genes in different tissues, from Stelplflug et al. 2016. (e) Confocal images of YFP-*AD1* shows co-localization with the ER marker mCHERRY-CNX1 in *N. benthamiana* leaf epidermal cells. Scale bars, 50 $\mu$ m.



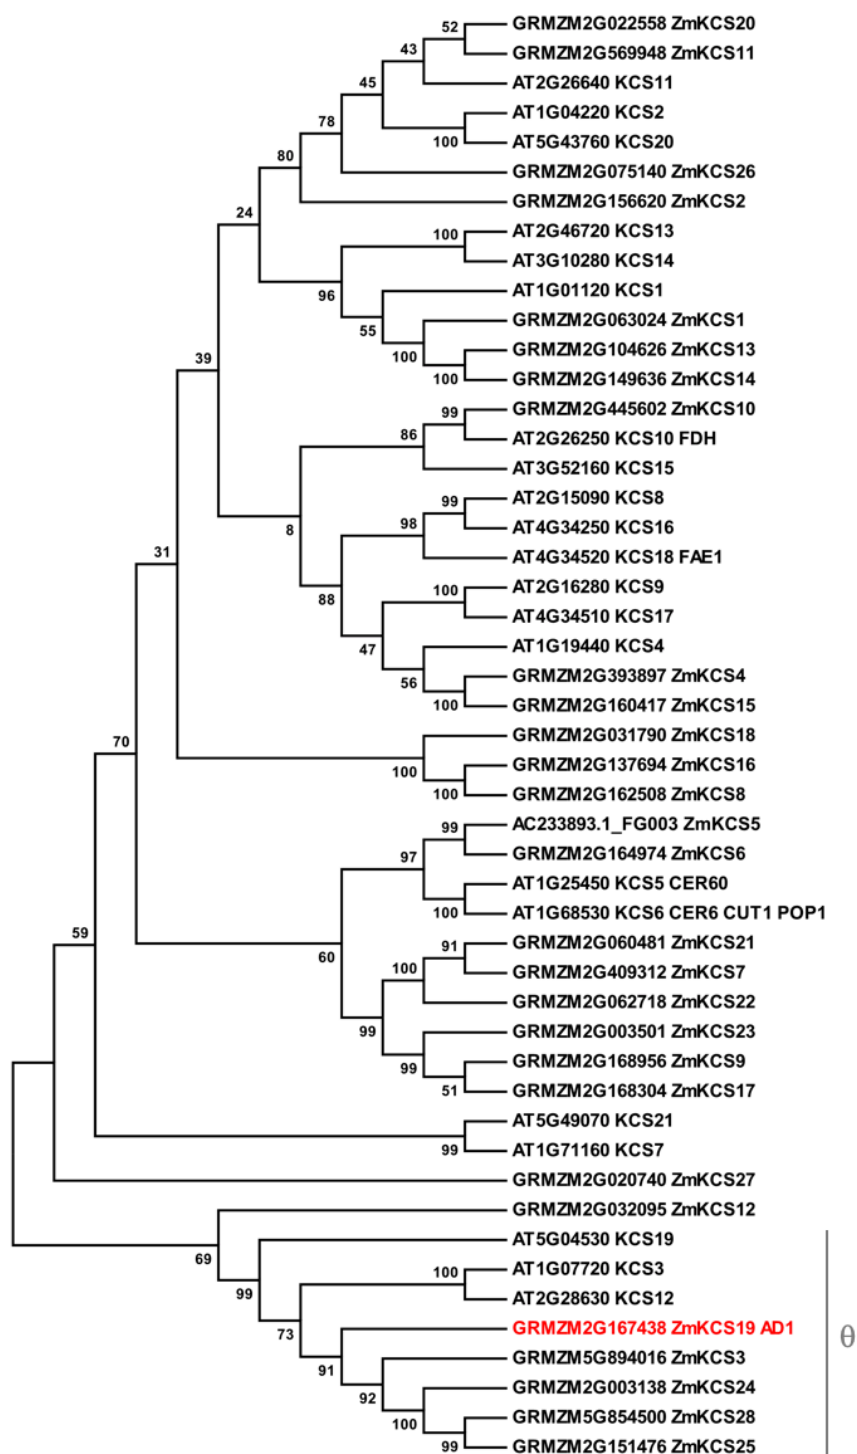

**Figure S3.** Neighbor-joining phylogenetic tree of maize (GRMZM) and Arabidopsis (AT) KCS family proteins. Numbers represent reliability levels based on 1000 bootstrap replications.

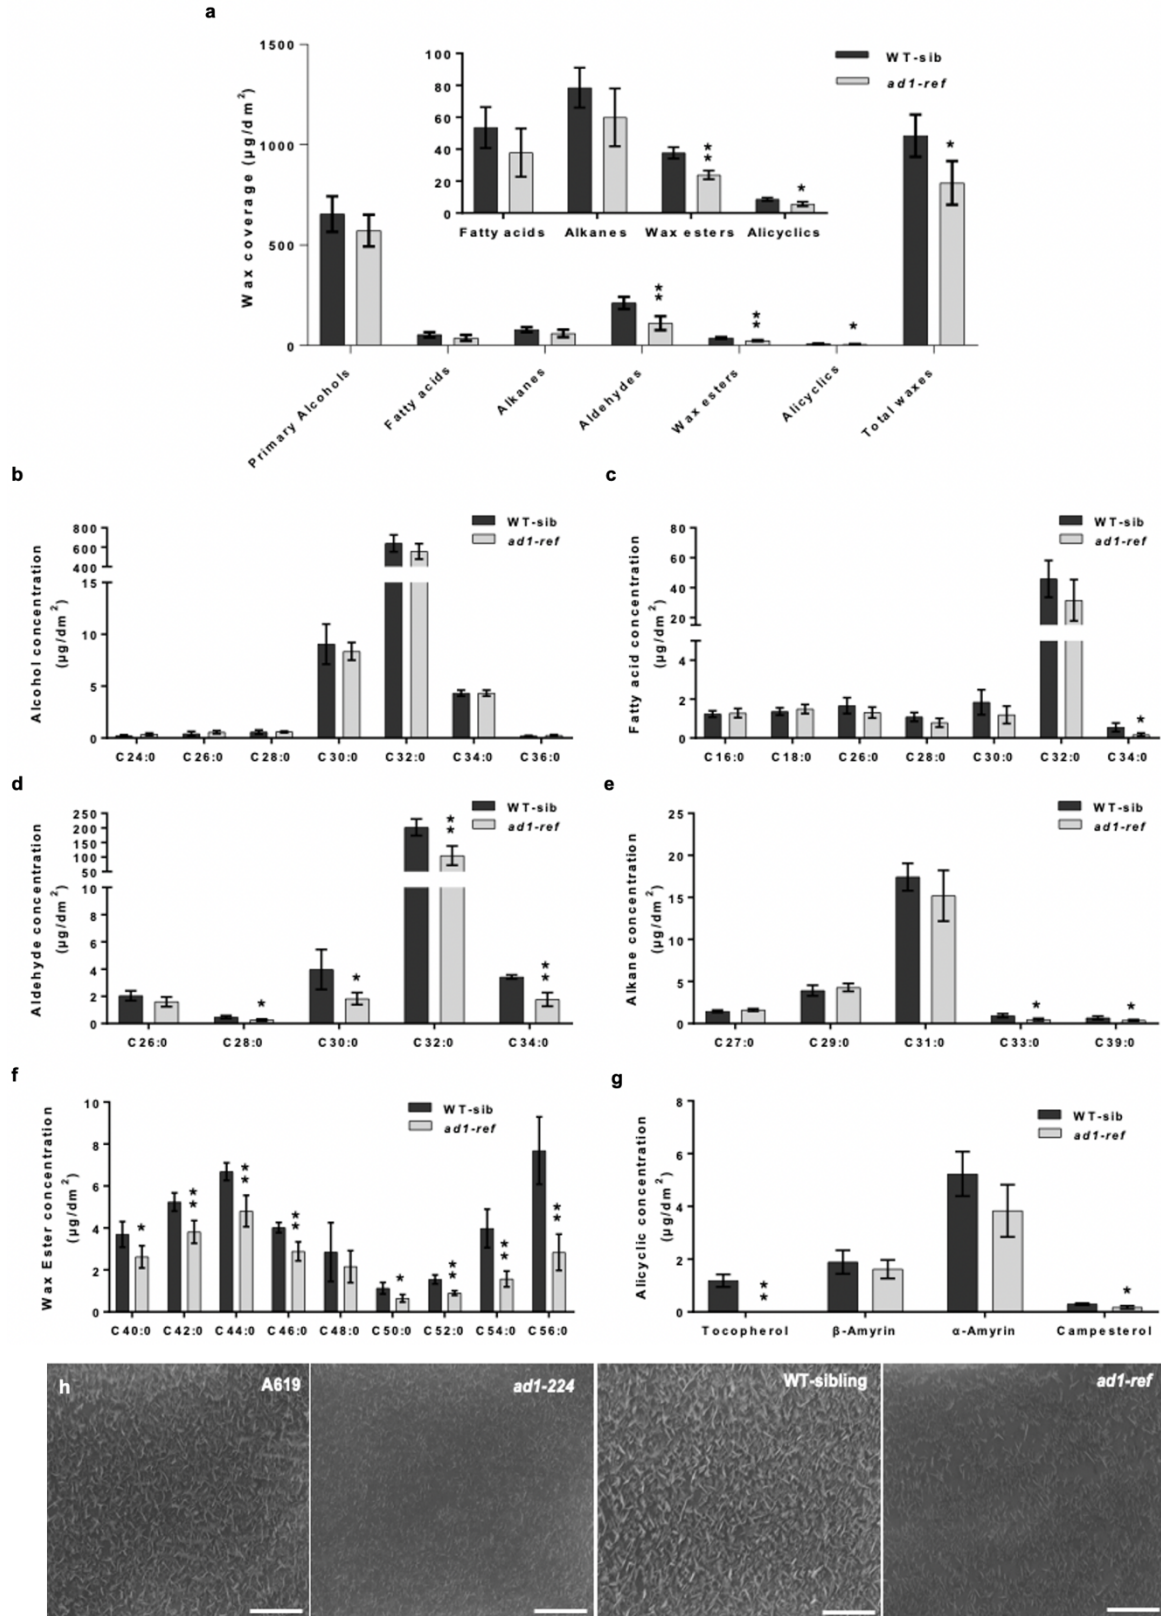

**Figure S4.** Cuticular wax analysis in *ad1-ref* mutants.

(a) Total wax coverage and amount of each wax class in *ad1-ref* mutants and wild type leaves. The inset shows the less abundant wax classes at a different scale to more clearly visualize significant differences. (b-g) Concentration of individual components in each wax class. primary alcohol (b), fatty acid (c), aldehyde (d), alkane (e), wax ester (f) and alicyclic (g). Means of 4 replicates and SD are reported. \* $p < 0.05$ ; \*\* $p < 0.01$ , Student's test. (h) SEM images of epicuticular wax crystals on the third leaves in A619, *ad1-224*, WT-sibling and *ad1-ref* samples used for the analysis. Scale bars, 5 $\mu$ m.



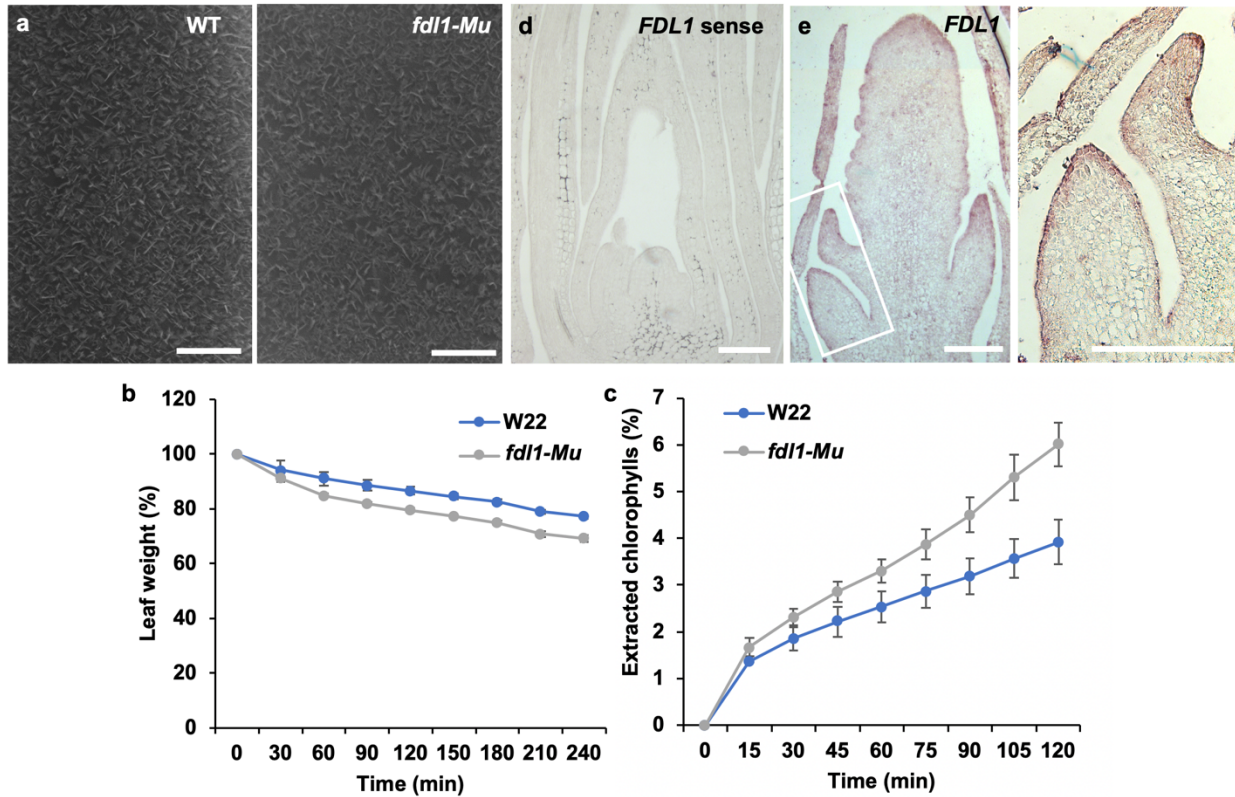

**Figure S5.** Analysis of *FDL1* function.

(a) SEM images of epicuticular wax crystals on the third leaves in wild type and *fdl1-Mu*. Scale bars, 5 $\mu$ m. (b) Water loss assays. Error bars show SD, n=3. (c) Chlorophyll leaching assays. Error bars show SD, n=3. (d,e) mRNA *in situ* hybridizations using *FDL1* sense control (d) and antisense probes (e). Expression pattern in embryo (d) and tassel (e); the right image is a higher magnification of the area framed in the left panel. Scale bars, 200 $\mu$ m.

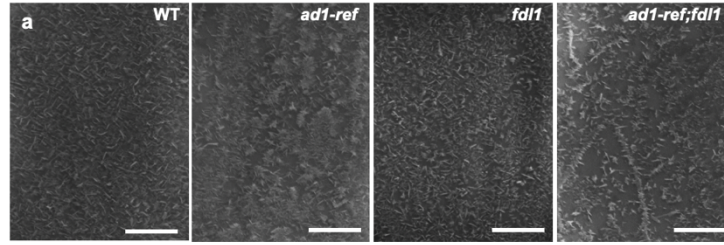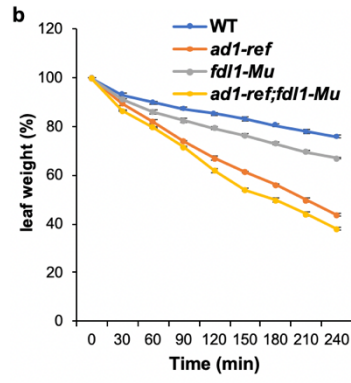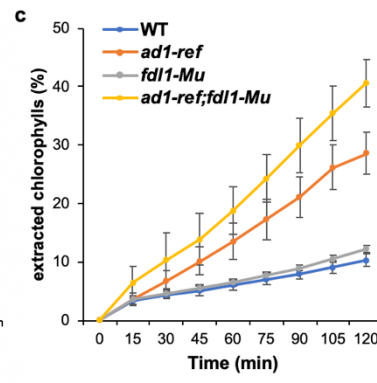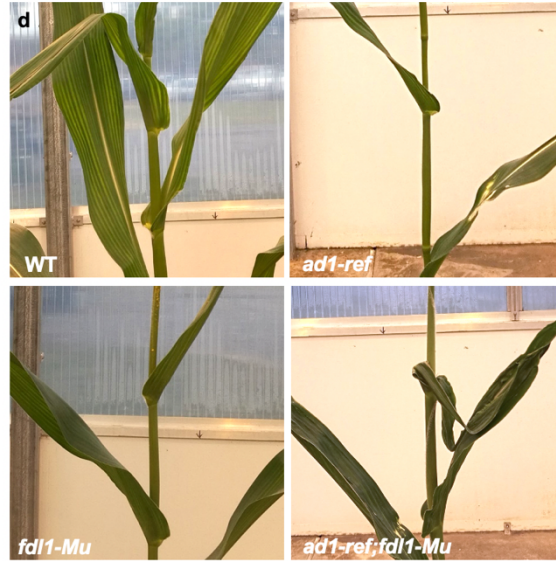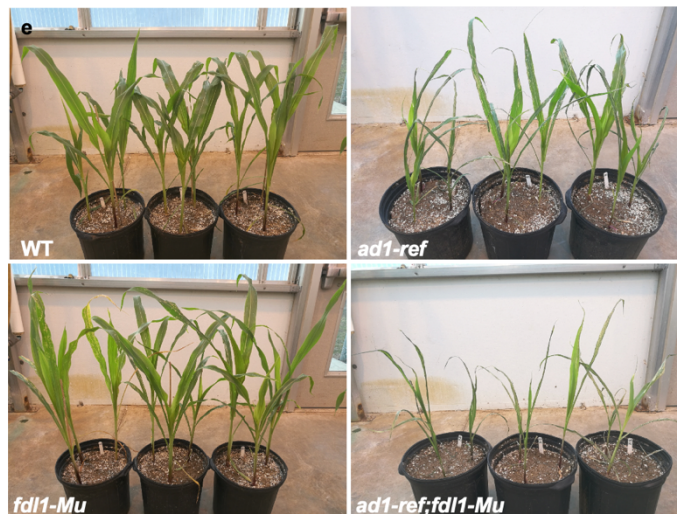

**Figure S6.** Double *ad1-ref;fdl1-Mu* mutant analysis.

(a) SEM images of epicuticular wax crystals on the third leaves in wild type, *ad1-ref*, *fdl1-Mu* and *ad1-ref;fdl1-Mu*. Scale bars, 5 $\mu$ m. (b) Water loss assays of dark-acclimated plants. Error bars show SD, n=3. (c) Chlorophyll leaching assays. Extracted chlorophyll contents at individual time points were expressed as percentages of that at 24 h after initial immersion. Error bars show SD, n=3. (d) Mature leaf fusion defects in single and double *ad1 fdl1* mutant adult plants. (e) Phenotype of single and double mutant plants exposed to drought stress.



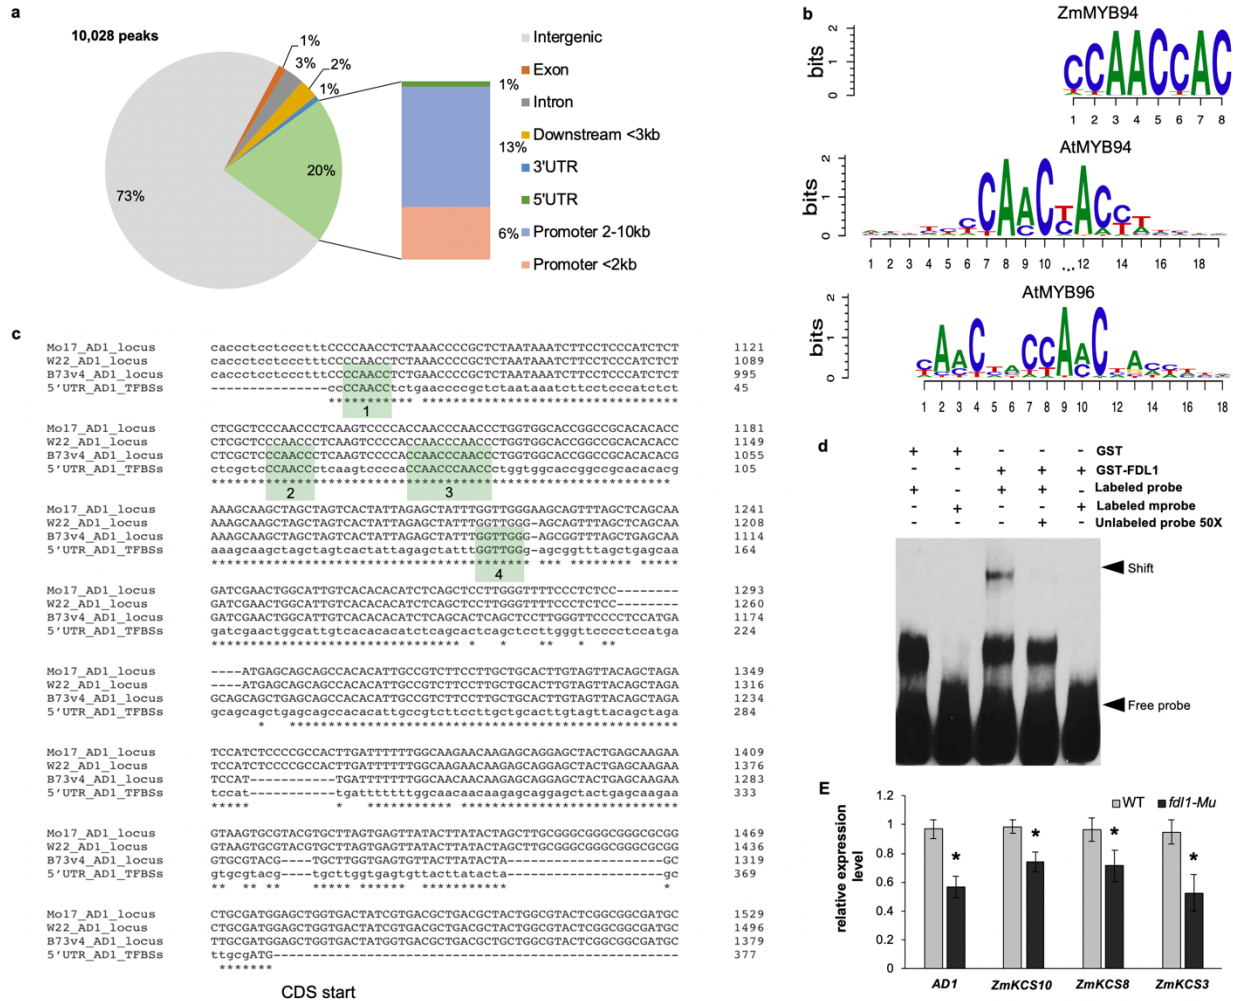

**Figure S7.** FDL1 DNA binding analysis.

(a) Distribution of FDL1 peaks within gene features. (b) Comparison of DAP-seq identified motifs for ZmMYB94 and AtMYB94 and AtMYB96 (O'Malley et al., 2015). ZmMYB94 and AtMYB94 show highly similar motifs with minor nucleotide variants. (c) Alignment of *AD1* 5'UTR region from maize reference genome inbred line B73 and two additional inbred lines, Mo17 and W22. Region containing CCAACC motifs (highlighted in green; numbered) are conserved across inbreds. (d) EMSA showing GST-FDL1 directly binds to the promoter of *AD1*. Mutation of three of the four CCAACC motifs shown in (c) abolishes the interaction. Competition with unlabeled probe shows specificity of interaction. (e) Comparison of *AD1* and selected KCS genes expression levels between wild type and *fd1-1-Mu*. The maize *UBIQUITIN* gene was used as reference. Values are means  $\pm$  SD (n=3). \* $p < 0.001$ , Student's two-tail t-test.

**a CUTICULAR WAX BIOSYNTHESIS RELATED GENES**

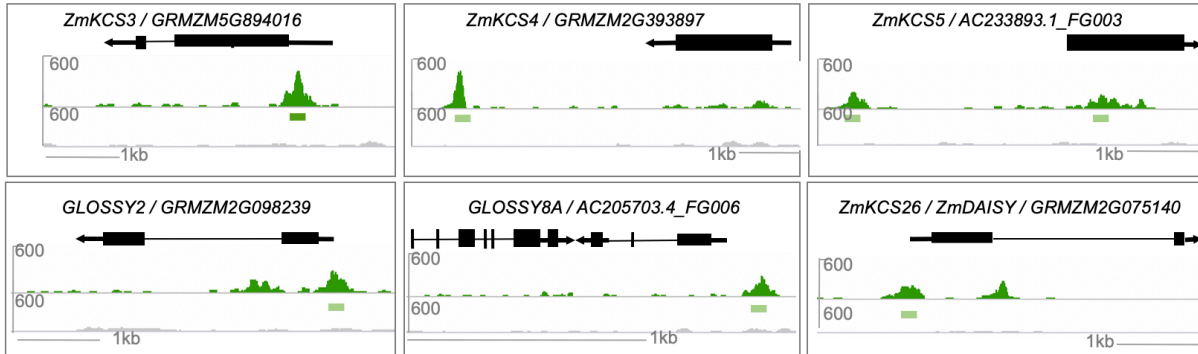

**b CUTIN BIOSYNTHESIS RELATED GENES**

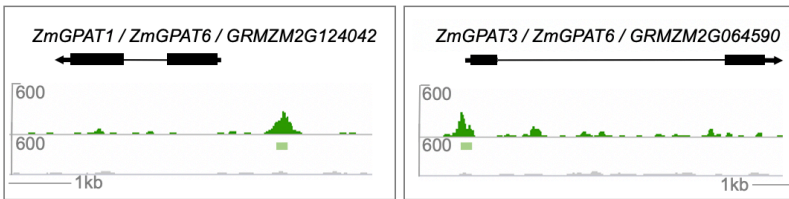

**c CUTICLE COMPONENT TRANSPORT**

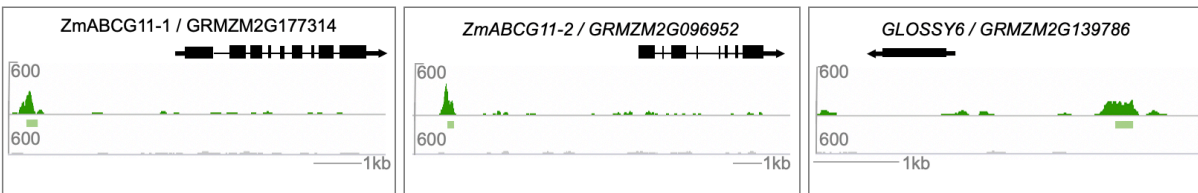

**d FATTY ACID RELATED**

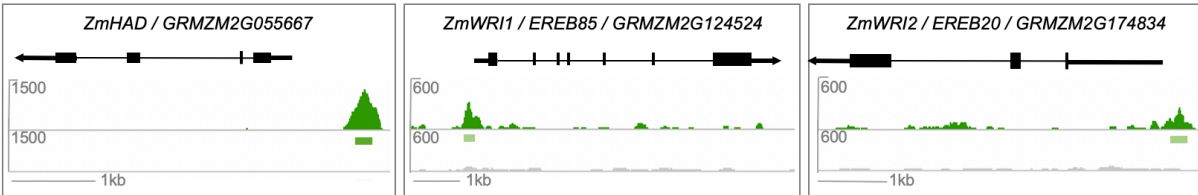

**e CELL WALL MODIFYING ENZYMES**

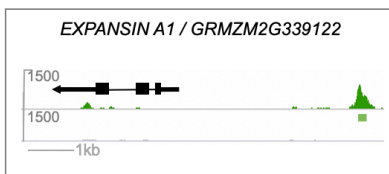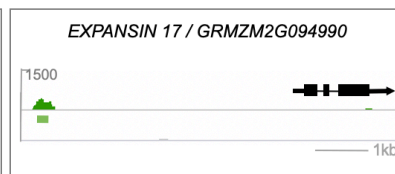

**f PHOSPHOLIPID SYNTHESIS**

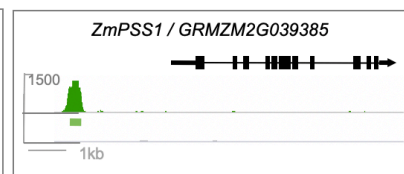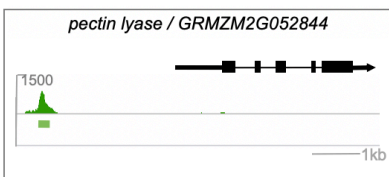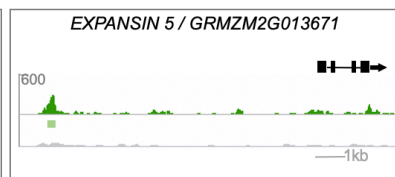

**g DROUGHT/DESSICATION TOLERANCE**

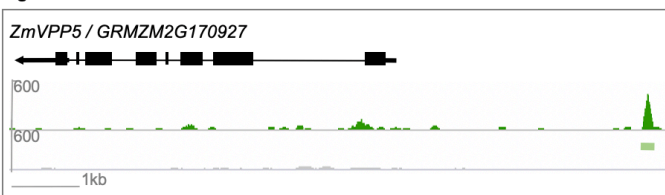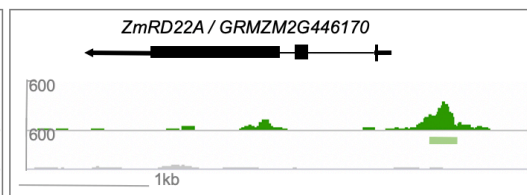

**Figure S8.** Genome browser screenshots of FDL1 binding.

(a) Genome browser screenshots showing location of FDL1 binding events in several *KCS* and other cuticular wax related biosynthesis genes. Screenshots showing FDL1 binding in cutin biosynthesis related genes (b), cuticular transporters (c), genes related to fatty acid biosynthesis and regulation (d), genes encoding cell wall modifying enzymes (e), a gene regulating phospholipid biosynthesis (f), and genes involved in drought or desiccation tolerance (g). In all panels, 200bp peak regions are shown as green intensity bars under the green FDL1 binding peaks. A negative control sample (affinity tag only) is shown as a gray colored peak track under the green FDL1 peak track.



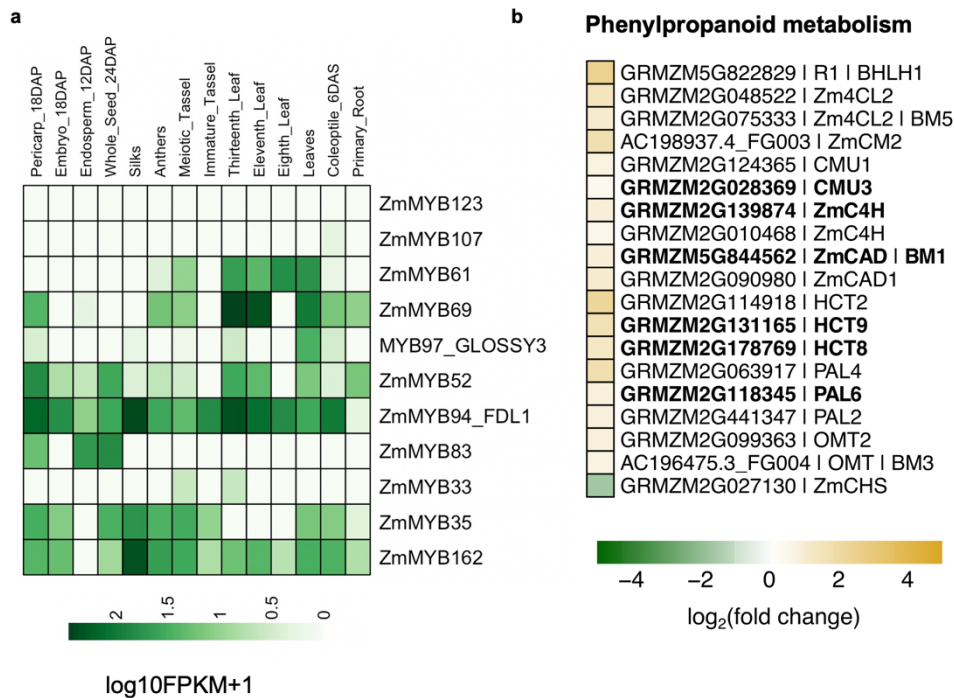

**Figure S9.** Analysis of *FDL1* expression and binding targets.

(a) *FDL1/ZmMYB94* and closely related *MYB* transcription factors are expressed in many tissues throughout development. *ZmMYB162* is directly bound by *FDL1* and up-regulated in *fdl1-Mu* coleoptiles. *ZmMYB83* and *ZmMYB123* are directly bound by *FDL1* in DAP-seq. Tissue specific RNA-seq data from Stelpflug et al. (b) Differentially expressed genes in *fdl1-Mu* mutant coleoptiles related to phenylpropanoid metabolism. Genes that were directly bound by *FDL1* in DAP-seq are shown in bold.

| PRIMERS                     | SEQUENCE 5'-3'                                                                                                     | PURPOSE                       |
|-----------------------------|--------------------------------------------------------------------------------------------------------------------|-------------------------------|
| <i>ad1-224</i>              | For: TGTCAGTCATGGATGCTGGATTACG<br>Rev: CATGAAGGTGCGCTTGTGCCCCGGTA                                                  | dCAPS KpnI - genotyping       |
| <i>ad1-ref</i>              | For: TGTCAGTCATGGATGCTGGATTACG<br>Rev: CTCAGCTAGCATTGTTGTGCTCACC                                                   | genotyping                    |
| <i>fdl1-Mu</i>              | For: GAGTACACGAGCAATCCGCAA<br>Rev: CGCCAGGTTGATGTCCGTCT                                                            | genotyping                    |
| <i>UBI-RT</i>               | For: GAGTGCCCCAACGCCGAGTG<br>Rev: CTACGCCTGCTGGTTGTAGACGTA                                                         | Real-time PCR                 |
| <i>AD1-RT</i>               | For: TCTCCAACCCATTCATGGACAA<br>Rev: TTGAGACGTTGAGTTGAGCAGCT                                                        | Real-time PCR                 |
| <i>ZmKCS10-RT</i>           | For: ATGGACGCCTAGCACGTACCT<br>Rev: GGTGAAGTGACGACTGCACT                                                            | Real-time PCR                 |
| <i>ZmKCS8-RT</i>            | For: GAGACCACCTACAAGTTCGCTGA<br>Rev: GCTGATGATGAGAAATCAATCATGT                                                     | Real-time PCR                 |
| <i>ZmKCS3-RT</i>            | For: GGAGGACTGCATCGACCAGTA<br>Rev: TCGTTAACCCATCCGAACCTGT                                                          | Real-time PCR                 |
| <i>AD1-antisense-Probe</i>  | For: GAATTCGGCCGTCAAGGCCACCCTAGCTGCTCAACTCAACGT<br>Rev: AGTCGACGGCCCATGAGGCCAGGACGACACTGACTGATTGACT                | <i>In situ</i>                |
| <i>FDL1-antisense-Probe</i> | For: GAATTCGGCCGTCAAGGCCAGTGTCCAATCGATCAAGCTCAA<br>Rev: AGTCGACGGCCCATGAGGCCACTTGACACAAGGGGATCTACGTA               | <i>In situ</i>                |
| <i>AD1-sense-Probe</i>      | For:<br>AGTGAATTCGGTAATACGACTCACTATAGGGCTCCCTAGCTGCTCAACTCAAC<br>Rev: AGTCGACGGCCCATGAGGCCAGGACGACACTGACTGATTGACT  | <i>In situ</i>                |
| <i>FDL1-sense-Probe</i>     | For:<br>AGTGAATTCGGTAATACGACTCACTATAGGGCTGTGTCCAATCGATCAAGCTC<br>Rev: AGTCGACGGCCCATGAGGCCACTTGACACAAGGGGATCTACGTA | <i>In situ</i>                |
| <i>AD1-EMSA-Probe</i>       | For: GACCCATGTCATGATGTGGTAT<br>Rev: CCAAATAGCTCTAATAGTACTA                                                         | EMSAs                         |
| <i>AD1-Pro-mut1</i>         | For: TTCAAGTCCCCATTTTTTTTTTTTGGTGGCACCGGCCGCACAC<br>Rev: AAAAAAATGGGACTTGAAAAAAGCGAGAGAGATGGGAGG                   | EMSAs                         |
| <i>AD1-Pro-mut2</i>         | For: CCCTTTTTTTTTTCTGAACCCCGCTCTAATAAATCTTCT<br>Rev: GGTTTCAGAAAAAAAAAAGGGAGGAGGGTGGAGGGTGGTT                      | EMSAs                         |
| <i>pGreenII-AD1Pro</i>      | For: TCGAGGTCGACGGTATCGATCCACACAATCGAGCACGACAT<br>Rev: CGGCCGCTCTAGAAGTGTGCGCAAGCTAGTATAAGTAACA                    | Transient Transcription Assay |
| <i>pRI101-MYB94</i>         | For: AAGTTCTTCACTGTTGATACATGGTGAGGCCGCGTGCTG<br>Rev: AGTTGTTGATTGAGAATTCGCTAGAAGGGGTAATCCATGG                      | Transient Transcription Assay |

**Table S1.** List of primers used in this study.

| ZmName                                             | geneID           | peak location      | peak distance from TSS | Peak Signal Value | log2FC in fdl1-Mu coleoptiles | Arabidopsis homolog                   | description                                              |
|----------------------------------------------------|------------------|--------------------|------------------------|-------------------|-------------------------------|---------------------------------------|----------------------------------------------------------|
| <b>Cuticular wax and fatty acid elongation</b>     |                  |                    |                        |                   |                               |                                       |                                                          |
| <i>ADHERENT1, KCS19</i>                            | GRMZM2G167438    | Promoter (<=1kb)   | 0                      | 33                | #N/A                          | <i>KCS12, KCS19</i>                   | 3-ketoacyl-CoA synthase                                  |
| <i>ZmKCS3</i>                                      | GRMZM5G894016    | 5' UTR             | 643                    | 47                | #N/A                          | <i>KCS12, KCS3</i>                    | 3-ketoacyl-CoA synthase                                  |
| <i>ZmKCS4</i>                                      | GRMZM2G393897    | Downstream (2-3kb) | 5130                   | 44                | #N/A                          | <i>KCS4</i>                           | 3-ketoacyl-CoA synthase                                  |
| <i>ZmKCS5</i>                                      | AC233893.1_FG003 | Promoter (2-3kb)   | -2617                  | 28                | #N/A                          | <i>CER6, CUT1, G2, KCS6, POP1</i>     | 3-ketoacyl-CoA synthase                                  |
|                                                    |                  | Exon               | 330                    | 33.2              |                               |                                       |                                                          |
| <i>ZmKCS26</i>                                     | GRMZM2G075140    | Promoter (<=1kb)   | 0                      | 30                | -0.554471                     | <i>KCS2</i>                           | 3-ketoacyl-CoA synthase                                  |
| <i>GLOSSY8A</i>                                    | AC205703.4_FG006 | Promoter (<=1kb)   | -627                   | 40                | #N/A                          | <i>ATKCR1, KCR1, YBR159</i>           | beta-ketoacyl reductase                                  |
| <i>GLOSSY26</i>                                    | GRMZM2G481843    | Promoter (<=1kb)   | 0                      | 35.8              | -0.396167                     | <i>CER10, ECR, TSC13</i>              | 3-oxo-5-alpha-steroid 4-dehydrogenase family protein     |
| <i>GLOSSY2</i>                                     | GRMZM2G098239    | Promoter (<=1kb)   | 0                      | 34                | #N/A                          | <i>CER2, VC-2, VC2</i>                | HXXXD-type acyl-transferase family protein               |
| <i>ZmCER3</i>                                      | GRMZM2G029912    | Intron             | 214                    | 35                | -0.524724                     | <i>CER3, FLP1, WAX2, YRE</i>          | Fatty acid hydroxylase superfamily                       |
| <i>GLOSSY6</i>                                     | GRMZM2G139786    | Promoter (1-2kb)   | -1851                  | 39                | -0.518466                     | <i>AT1G09310</i>                      | Protein of unknown function, DUF538                      |
| <b>Cutin</b>                                       |                  |                    |                        |                   |                               |                                       |                                                          |
| <i>ZmBDG</i>                                       | GRMZM2G030636    | 5' UTR             | 122                    | 44                | -1.12516                      | <i>BDG1, BODYGUARD</i>                | alpha/beta-Hydrolases superfamily protein                |
|                                                    |                  | Promoter (<=1kb)   | 0                      | 97                |                               |                                       | Zm                                                       |
| <i>ZmGPAT3</i>                                     | GRMZM2G064590    | Promoter (<=1kb)   | 0                      | 37                | #N/A                          | <i>ATGPAT5, ATGPAT6</i>               | glycerol-3-phosphate acyltransferase                     |
| <i>ZmGPAT1</i>                                     | GRMZM2G124042    | Promoter (<=1kb)   | -805                   | 35                | #N/A                          | <i>GPAT6</i>                          | glycerol-3-phosphate acyltransferase 6                   |
| <b>Wax and cutin transport</b>                     |                  |                    |                        |                   |                               |                                       |                                                          |
| <i>ABCG11-2</i>                                    | GRMZM2G177314    | Promoter (2-3kb)   | -2639                  | 31                | -0.432011                     | <i>ABCG11, COF1, DSO, WBC11</i>       | white-brown complex homolog protein 11                   |
| <i>ABCG11-5</i>                                    | GRMZM2G096952    | Promoter (6-7kb)   | -6563                  | 50                | #N/A                          | <i>ABCG11, COF1, DSO, WBC11</i>       | white-brown complex homolog protein 11                   |
| <b>Fatty Acid synthesis</b>                        |                  |                    |                        |                   |                               |                                       |                                                          |
| <i>ZmHAD</i>                                       | GRMZM2G055667    | Promoter (<=1kb)   | -773                   | 176               | -0.354572                     | <i>HAD</i>                            | Thioesterase superfamily protein                         |
| <b>TFs related to fatty acid/cuticle formation</b> |                  |                    |                        |                   |                               |                                       |                                                          |
| <i>EREB85, WR11</i>                                | GRMZM2G124524    | Promoter (<=1kb)   | 0                      | 36                | 0.626041                      | <i>AIL5, CHO1, EMK, ASML1, ATWR11</i> | AINTEGUMENTA-like 5, EREB TF                             |
| <i>EREB20, WR12</i>                                | GRMZM2G174834    | Promoter (<=1kb)   | -115                   | 31                | #N/A                          | <i>AIL5, CHO1, EMK, ASML1, ATWR11</i> | AINTEGUMENTA-like 5, EREB TF                             |
| <i>EREB143</i>                                     | GRMZM2G141219    | Promoter (<=1kb)   | -110                   | 24.6              | #N/A                          | <i>ASML1, ATWR11, ADAP</i>            | ARIA-interacting double AP2 domain protein, EREB TF      |
| <i>ZmNFXL2</i>                                     | GRMZM2G139369    | Promoter (1-2kb)   | -1881                  | 68                | #N/A                          | <i>ATNFXL2</i>                        | sequence-specific DNA binding transcription factor       |
| <b>Phospholipid Synthesis</b>                      |                  |                    |                        |                   |                               |                                       |                                                          |
| <i>ZmPSS1</i>                                      | GRMZM2G039385    | Promoter (2-3kb)   | -2572                  | 141.2             | #N/A                          | <i>AT1G71150</i>                      | phosphatidyl serine synthase family protein              |
| <b>Vesicle trafficking and secretory pathway</b>   |                  |                    |                        |                   |                               |                                       |                                                          |
| <i>SEC14</i>                                       | GRMZM2G704053*   | Promoter (3-4kb)   | -3358                  | 31                | 0.435357                      | <i>AT1G75170</i>                      | Sec14p-like phosphatidylinositol transfer family protein |
| <i>ZmSYP121</i>                                    | GRMZM2G414540    | Promoter (<=1kb)   | -20                    | 74                | NA                            | <i>PEN1, SYP121, AT3G11820</i>        | syntaxin of plants 121                                   |
| <b>Signaling</b>                                   |                  |                    |                        |                   |                               |                                       |                                                          |
| <i>ZmGSO1</i>                                      | GRMZM2G313643    | Promoter (<=1kb)   | 0                      | 32                | 0.540328                      | <i>GSO1, SGN3, AT4G20140</i>          | LRR receptor-like serine/threonine-protein kinase GSO1   |
| <i>ZmGSO1</i>                                      | GRMZM2G172429    | NA                 | NA                     | NA                | -0.92111                      | <i>GSO1, SGN3, AT4G20140</i>          | LRR receptor-like serine/threonine-protein kinase GSO1   |

**Table S2.** List of genes involved in cuticle formation directly bound by FDL1 in DAP-seq.



## REFERENCES

**O'Malley RC, Huang SSC, Song L, Lewsey MG, Bartlett A, Nery JR, Galli M, Gallavotti A, Ecker JR. 2016.** Cistrome and Epicistrome Features Shape the Regulatory DNA Landscape. *Cell* **165**(5): 1280-1292.

**Stelpflug SC, Sekhon RS, Vaillancourt B, Hirsch CN, Buell CR, de Leon N, Kaeppler SM. 2016.** An Expanded Maize Gene Expression Atlas based on RNA Sequencing and its Use to Explore Root Development. *Plant Genome* **9**(1); doi.org/10.3835/plantgenome2015.04.0025.
